# Supplementary material
Source: publisher figshare collection journal article supplement (https://acs.figshare.com/ndownloader/files/25104100)
Supplement: Supplementary file 1 [file 25104100]

## Supporting Information

# Investigations Into Aqueous Redox Flow Batteries Based on Ferrocene Bisulfonate

*Zhiling Zhao,<sup>†</sup> Baosen Zhang, Briana R. Schrage, Christopher J. Ziegler,\* and Aliaksei Boika\**

Department of Chemistry, The University of Akron, Akron, OH 44325

*\*Co-corresponding authors. E-mails: [aboika@uakron.edu](mailto:aboika@uakron.edu) (A.B.), [ziegler@uakron.edu](mailto:ziegler@uakron.edu)*

*(C.J.Z.)*

*<sup>†</sup>Present address: Institute for Bioscience and Biotechnology Research, University of Maryland, College Park, Maryland 20742, United States.*

## Table of Contents

|                                                                                                                                                                                                                                                                            | Page |
|----------------------------------------------------------------------------------------------------------------------------------------------------------------------------------------------------------------------------------------------------------------------------|------|
| <b>Figure S1.</b> Solubility tests using UV–visible spectroscopy.                                                                                                                                                                                                          | S3   |
| <b>Figure S2.</b> $^1\text{H}$ NMR (300 MHz) of <b>1,1'-FcDS</b> in $d_6$ -DMSO.                                                                                                                                                                                           | S4   |
| <b>Figure S3.</b> $^{13}\text{C}\{^1\text{H}\}$ NMR (125 MHz) of <b>1,1'-FcDS</b> in $d_6$ -DMSO.                                                                                                                                                                          | S5   |
| <b>Figure S4:</b> High-resolution ESI mass spectra of <b>1,1'-FcDS</b> .                                                                                                                                                                                                   | S6   |
| <b>Figure S5.</b> UV-visible spectrum for <b>1,1'-FcDS</b> in water.                                                                                                                                                                                                       | S7   |
| <b>Figure S6.</b> UV-visible spectra for <b>1,1'-FcDS</b> , basic iron(III) acetate, and the <b>1,1'-FcDS</b> (2M acetate buffer) decomposition solution in water.                                                                                                         | S8   |
| <b>Figure S7.</b> UV-visible spectra for <b>1,1'-FcDS</b> , $\text{FeCl}_3$ (1M $\text{H}_2\text{SO}_4$ ), and the <b>1,1'-FcDS</b> (0.5 M $\text{H}_2\text{SO}_4$ ) decomposition solution in water.                                                                      | S9   |
| <b>Figure S8.</b> CVs of 2 mM <b>1,1'-FcDS</b> in aqueous solution with 0.5 M EG.                                                                                                                                                                                          | S10  |
| <b>Figure S9.</b> CVs of 2 mM 2,7-AQDS (A) or 2 mM <b>1,1'-FcDS</b> (B) in aqueous solution.                                                                                                                                                                               | S11  |
| <b>Figure S10.</b> CVs of 3 mM 2,7-AQDS (A) or 3 mM <b>1,1'-FcDS</b> (B) in aqueous solution.                                                                                                                                                                              | S12  |
| <b>Figure S11.</b> 100 charge and discharge cycles at constant current 25 mA for <b>1,1'-FcDS</b> /2,7-AQDS RFB using 1 M $\text{NaNO}_3$ .                                                                                                                                | S13  |
| <b>Figure S12.</b> 100 charge and discharge cycles at constant current 25 mA for <b>1,1'-FcDS</b> /2,7-AQDS RFB using acetate buffer.                                                                                                                                      | S14  |
| <b>Figure S13.</b> <b>1,1'-FcDS</b> /2,7-AQDS RFB using 2 M acetate buffer as supporting electrolyte (0.5 M EG added). A: Ten charge and discharge cycles (#2 to #11 cycles) at constant current 25 mA; B: capacity vs cycling number; C: CE, EE and VE vs cycling number. | S15  |
| <b>Figure S14.</b> 100 charge and discharge cycles at constant current 25 mA for <b>1,1'-FcDS</b> /2,7-AQDS RFB using 0.5 M $\text{H}_2\text{SO}_4$ .                                                                                                                      | S16  |
| <b>Figure S15.</b> <b>1,1'-FcDS</b> permeability calculation plot.                                                                                                                                                                                                         | S17  |
| <b>Table S1.</b> X-ray crystal data and structure parameters for compounds <b>2,7-AQDS</b> and <b>1,1'-FcDS</b> .                                                                                                                                                          | S18  |

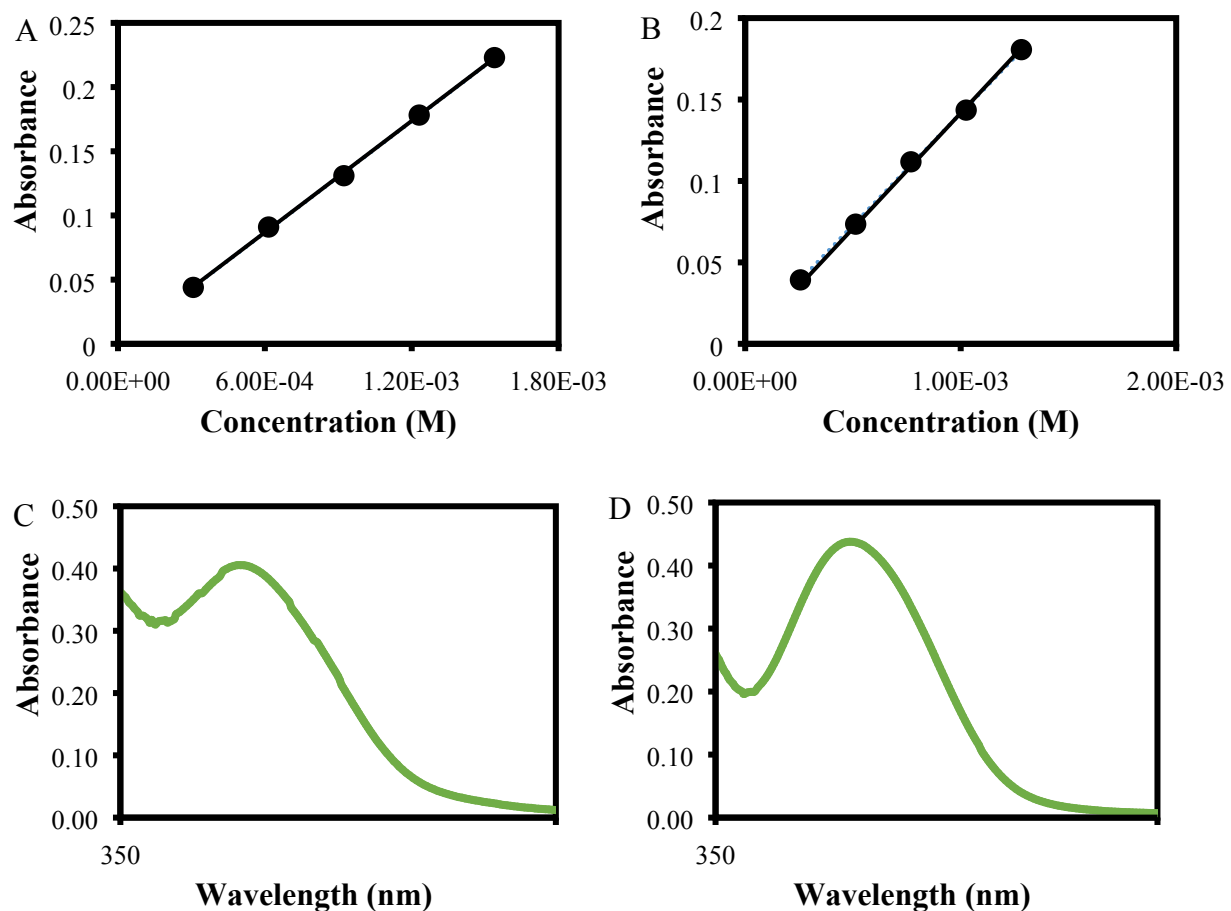

**Figure S1.** Solubility tests using UV-vis spectroscopy. A and B: Calibration curves for the relationship between absorbance and concentration of 1,1'-FcDS in 1 M NaNO<sub>3</sub> with (A) and without (B) the addition of 0.5 M EG. C and D: UV-vis spectra of diluted supernatant of 1,1'-FcDS supersaturated solutions prepared in 1 M NaNO<sub>3</sub> with (C: dilution 200 times) and without (D: dilution 100 times) the addition of 0.5 M EG.

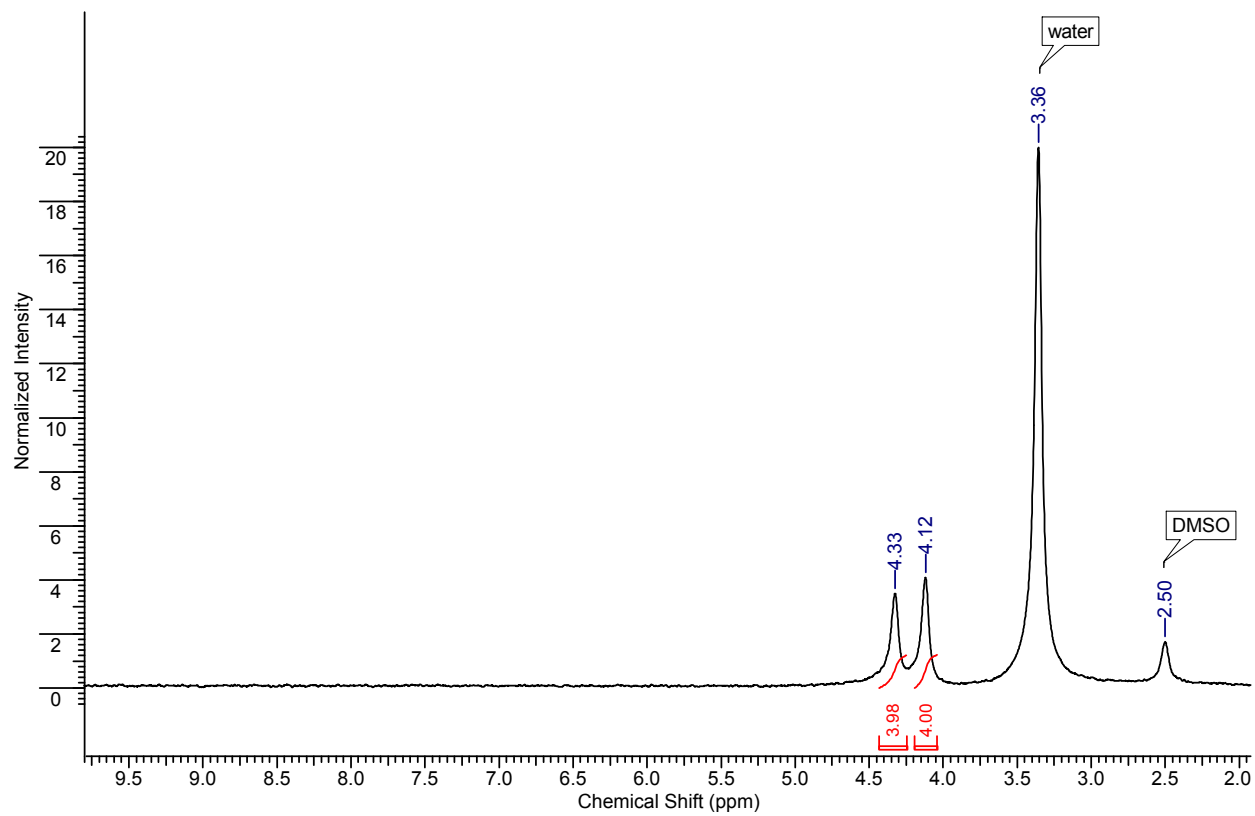

**Figure S2.**  $^1\text{H}$  NMR (300 MHz) of  $1,1'$ -FcDS in  $d_6$ -DMSO.

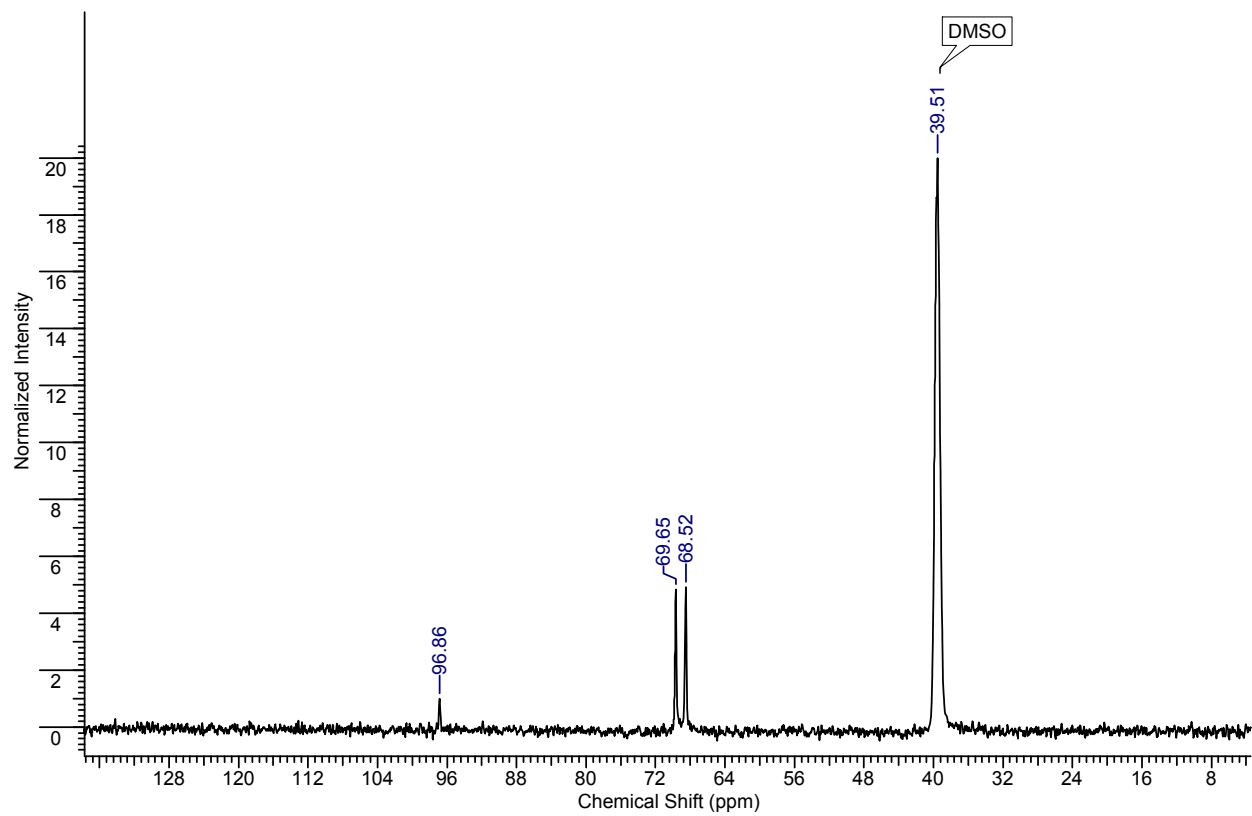

**Figure S3.**  $^{13}\text{C}\{^1\text{H}\}$  NMR (125 MHz) of 1,1'-FcDS in  $\text{d}_6\text{-DMSO}$ .

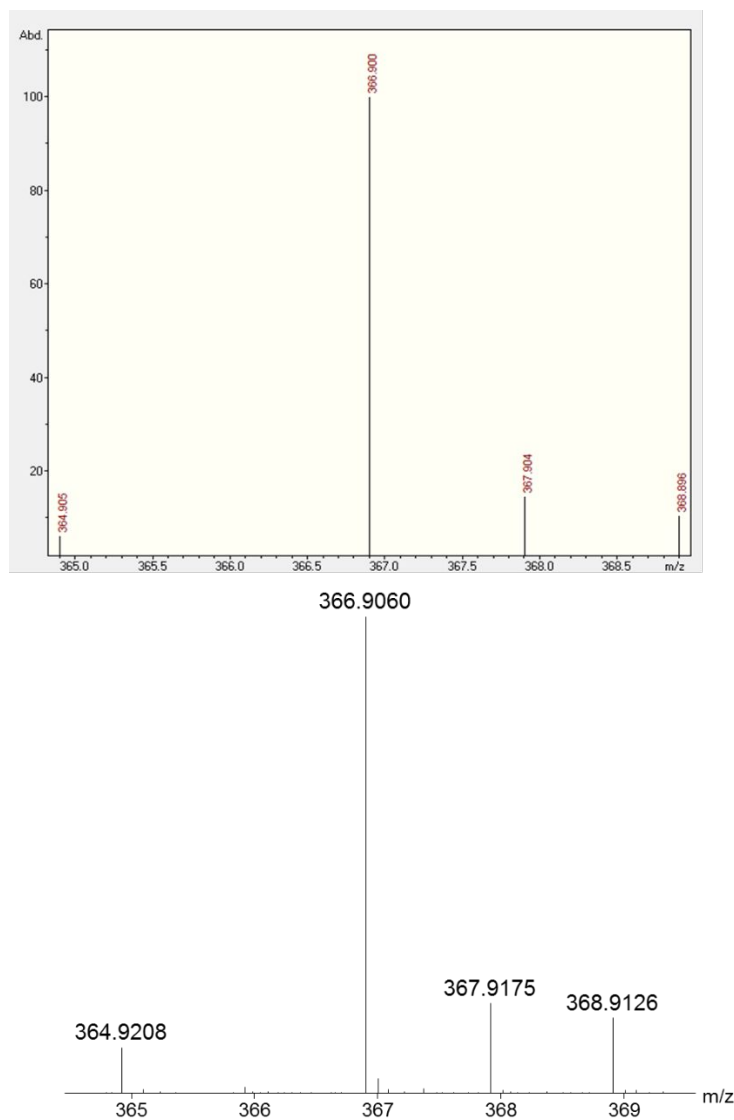

**Figure S4.** High-resolution ESI mass spectra of **1,1'-FcDS**. Top: calculated spectrum. Bottom: experimental spectrum.

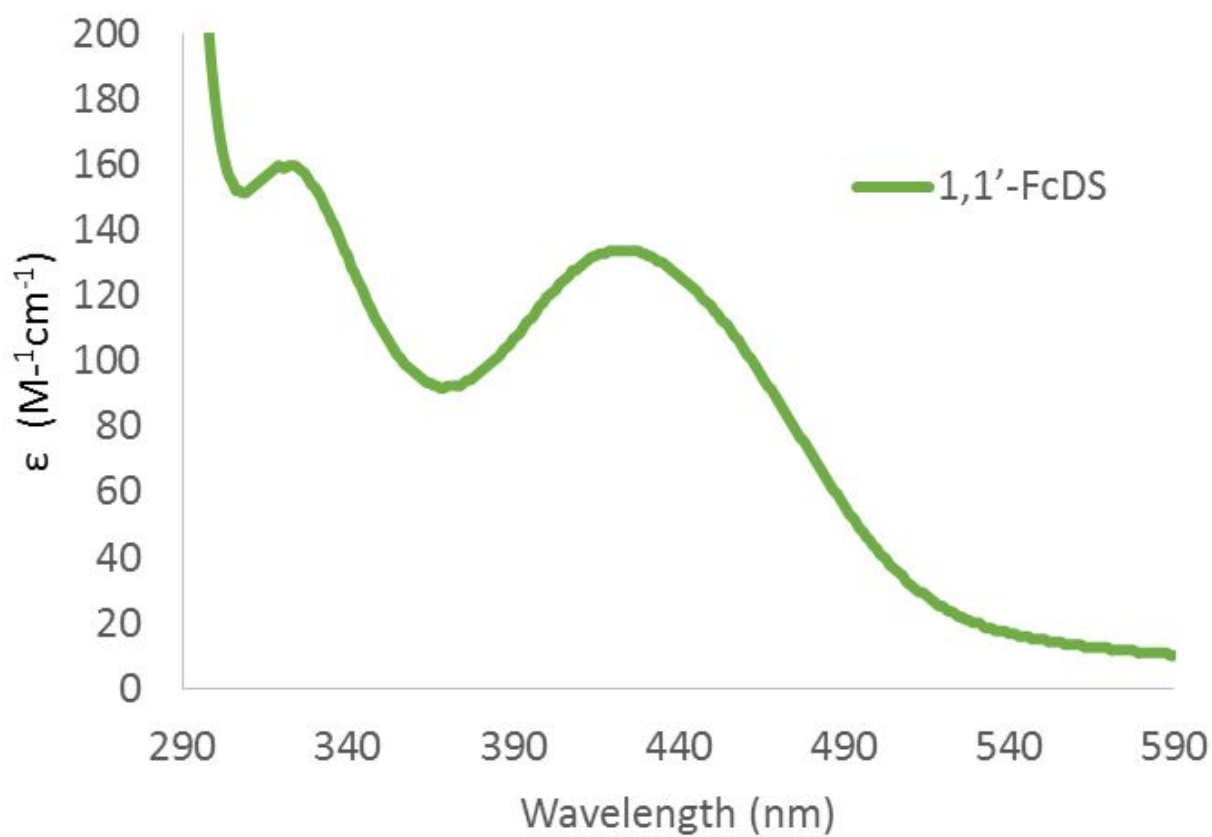

**Figure S5.** UV-visible spectrum for **1,1'-FcDS** in water.

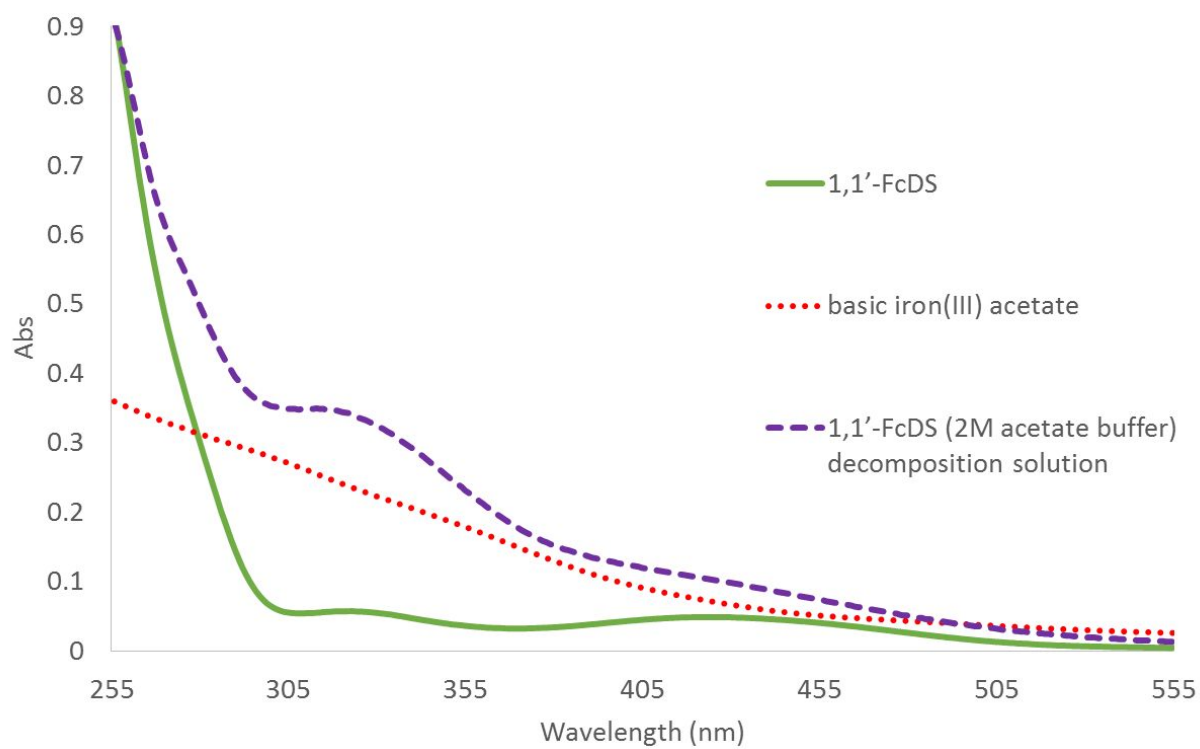

**Figure S6.** UV-visible spectra for **1,1'-FcDS**, basic iron(III) acetate, and the 1,1'-FcDS (2M acetate buffer) decomposition solution in water.



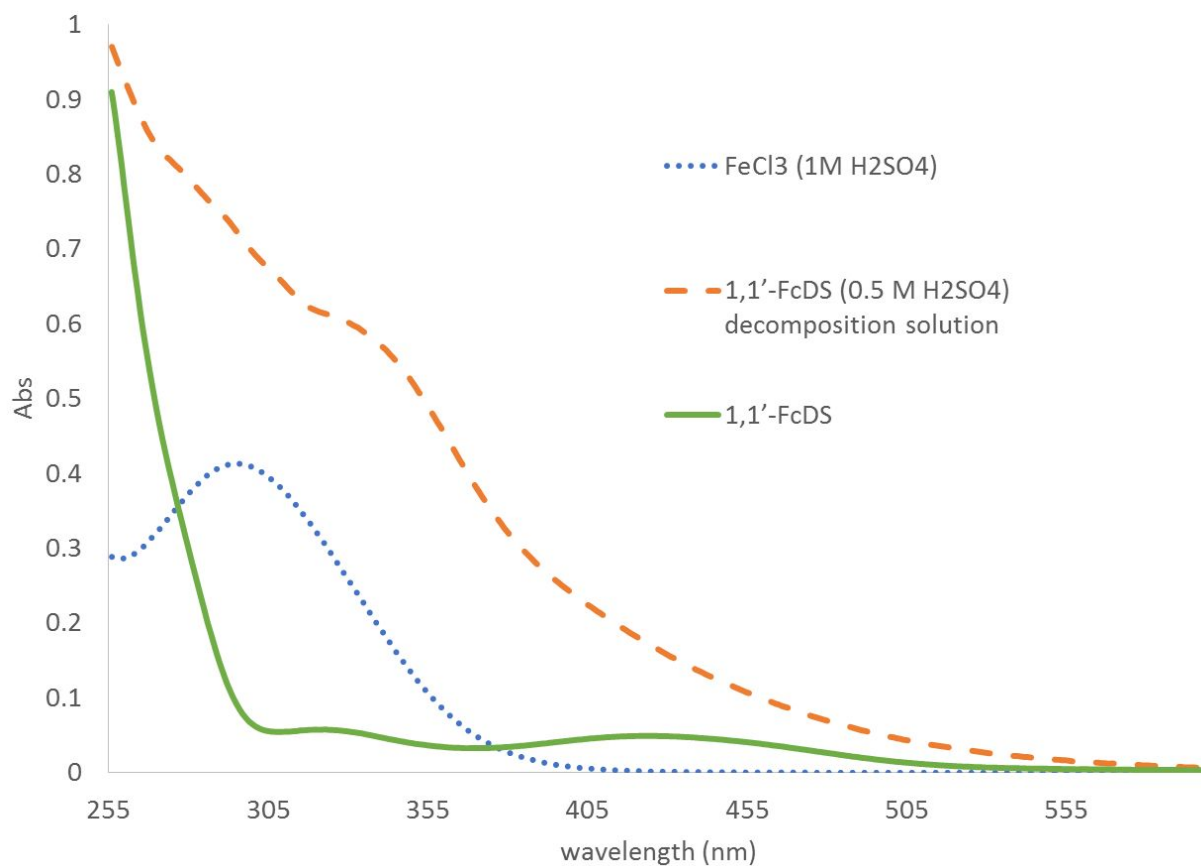

**Figure S7.** UV-visible spectra for **1,1'-FcDS**, FeCl<sub>3</sub> (1M H<sub>2</sub>SO<sub>4</sub>), and the 1,1'-FcDS (0.5 M H<sub>2</sub>SO<sub>4</sub>) decomposition solution in water.

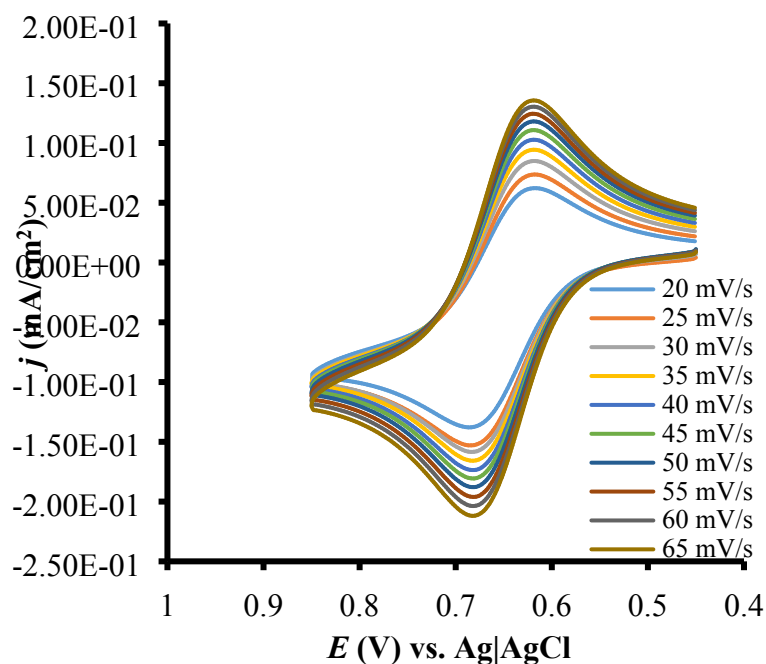

**Figure S8.** CVs of 2 mM 1,1'-FcDS in aqueous solution with 0.5 M EG. 1 M NaNO<sub>3</sub> was added as supporting electrolyte. Working electrode: 3 mm dia. glassy carbon, reference electrode: Ag|AgCl|KCl (2 M), counter electrode: platinum wire. From inner curve to outer one, the scan rate varies from 20 mV/s to 65 mV/s.

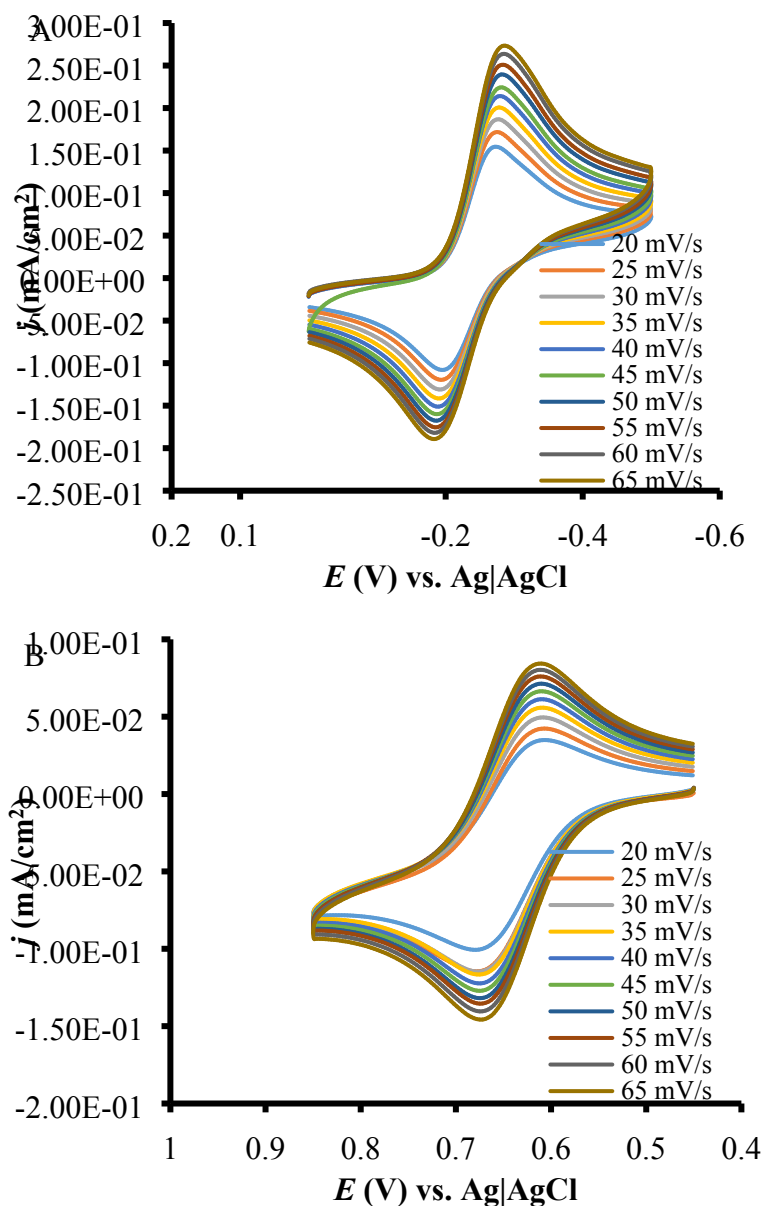

**Figure S9.** CVs of 2 mM 2,7-AQDS (A) or 2 mM 1,1'-FcDS (B) in aqueous solution. 2 M acetate buffer (pH:4.53) was added as supporting electrolyte. Working electrode: 3 mm dia. glassy carbon, reference electrode: Ag|AgCl|KCl (2 M), counter electrode: platinum wire. From inner curve to outer one, the scan rate varies from 20 mV/s to 65 mV/s.

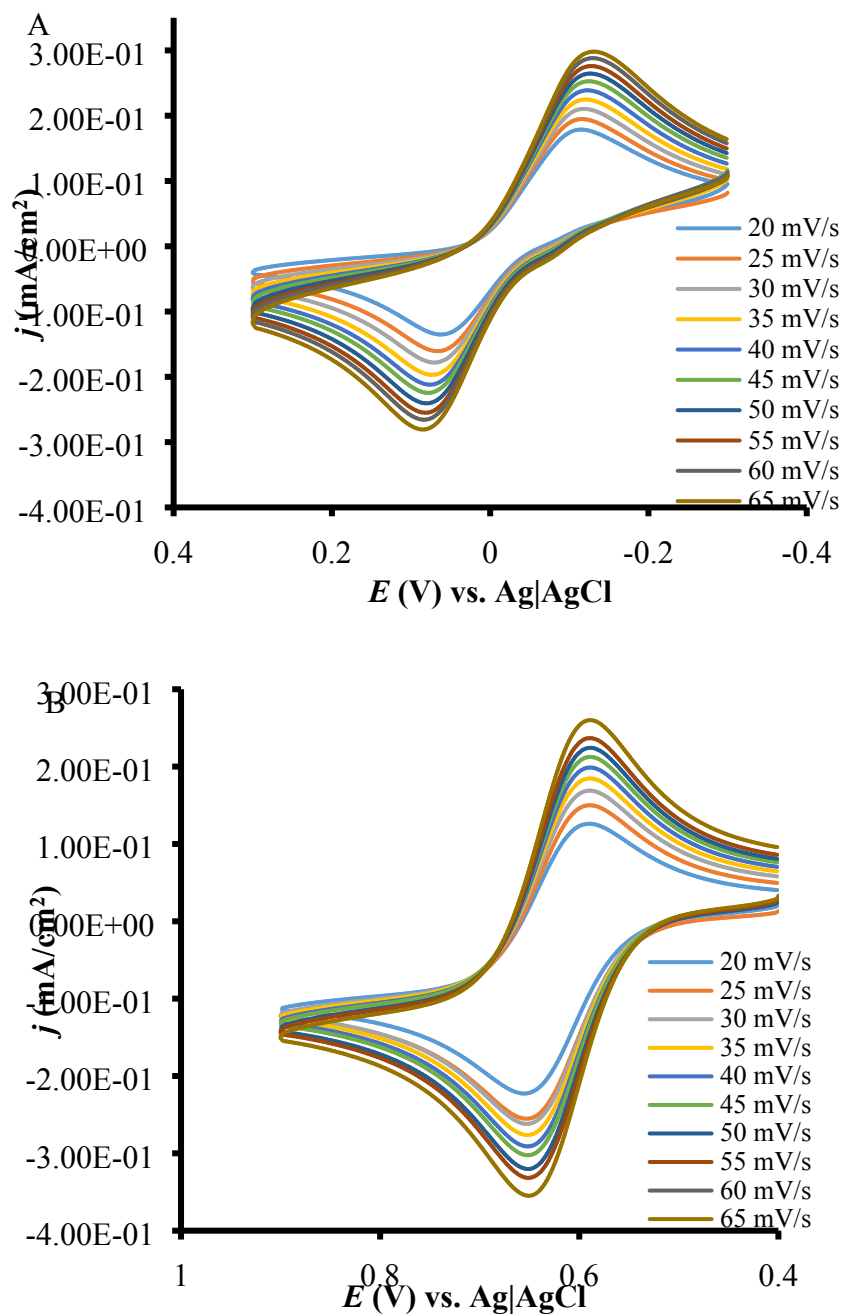

**Figure S10.** CVs of 3 mM 2,7-AQDS (A) or 3 mM 1,1'-FcDS (B) in aqueous solution. 0.5 M  $\text{H}_2\text{SO}_4$  was added as supporting electrolyte. Working electrode: 3 mm dia. glassy carbon, reference electrode:  $\text{Ag}|\text{AgCl}|\text{KCl}$  (2 M), counter electrode: platinum wire. From inner curve to outer one, the scan rate varies from 20 mV/s to 65 mV/s.

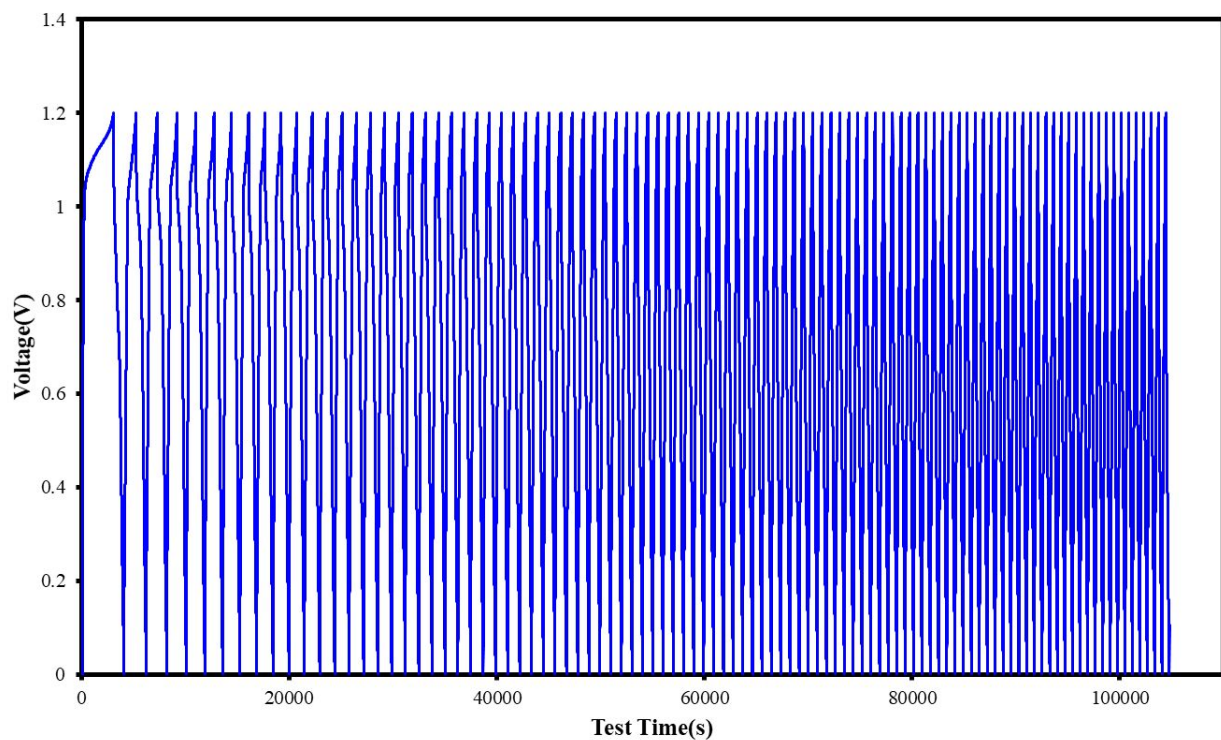

**Figure S11.** 100 charge and discharge cycles at constant current 25 mA for 1,1'-FcDS/2,7-AQDS RFB using 1 M NaNO<sub>3</sub> as supporting electrolyte (0.5 M EG added). Sodium ions serve as charge carriers during cell operation.

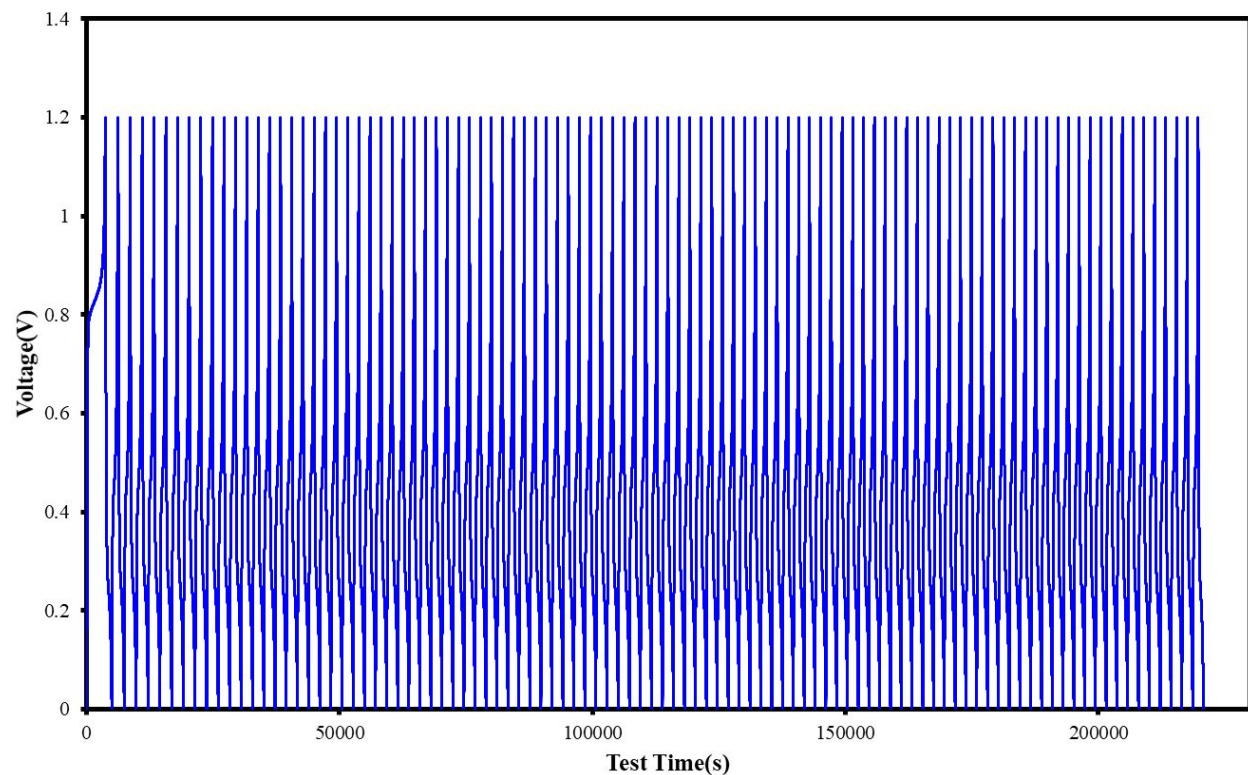

**Figure S12.** 100 charge and discharge cycles at constant current 25 mA for 1,1'-FcDS/2,7-AQDS RFB using 2 M acetate buffer as supporting electrolyte (0.5 M EG added). Sodium ions, as well as hydronium cations, serve as charge carriers during the cell operation.

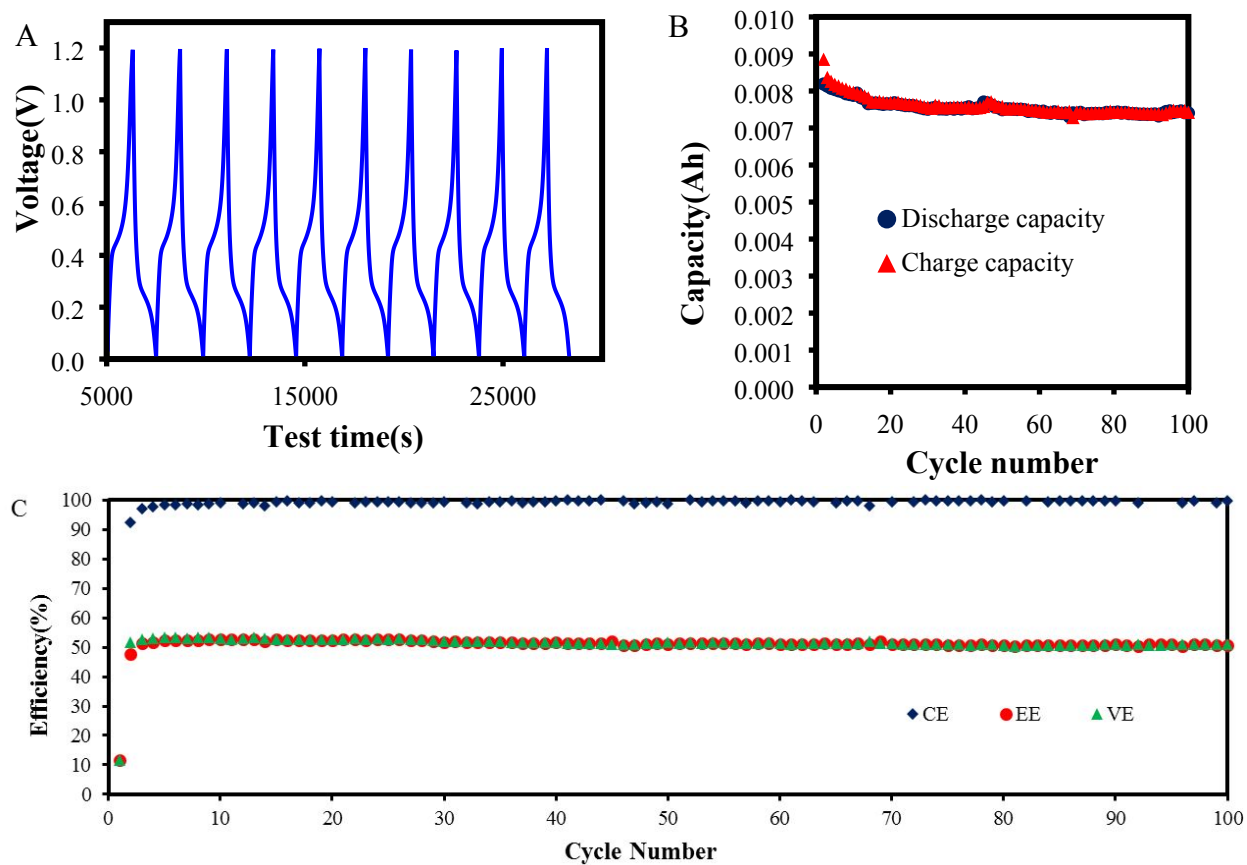

**Figure S13.** 1,1'-FcDS/2,7-AQDS RFB using 2 M acetate buffer as supporting electrolyte (0.5 M EG added). A: Ten charge and discharge cycles (#2 to #11 cycles) at constant current 25 mA; B: capacity vs cycling number; C: CE, EE and VE vs cycling number.

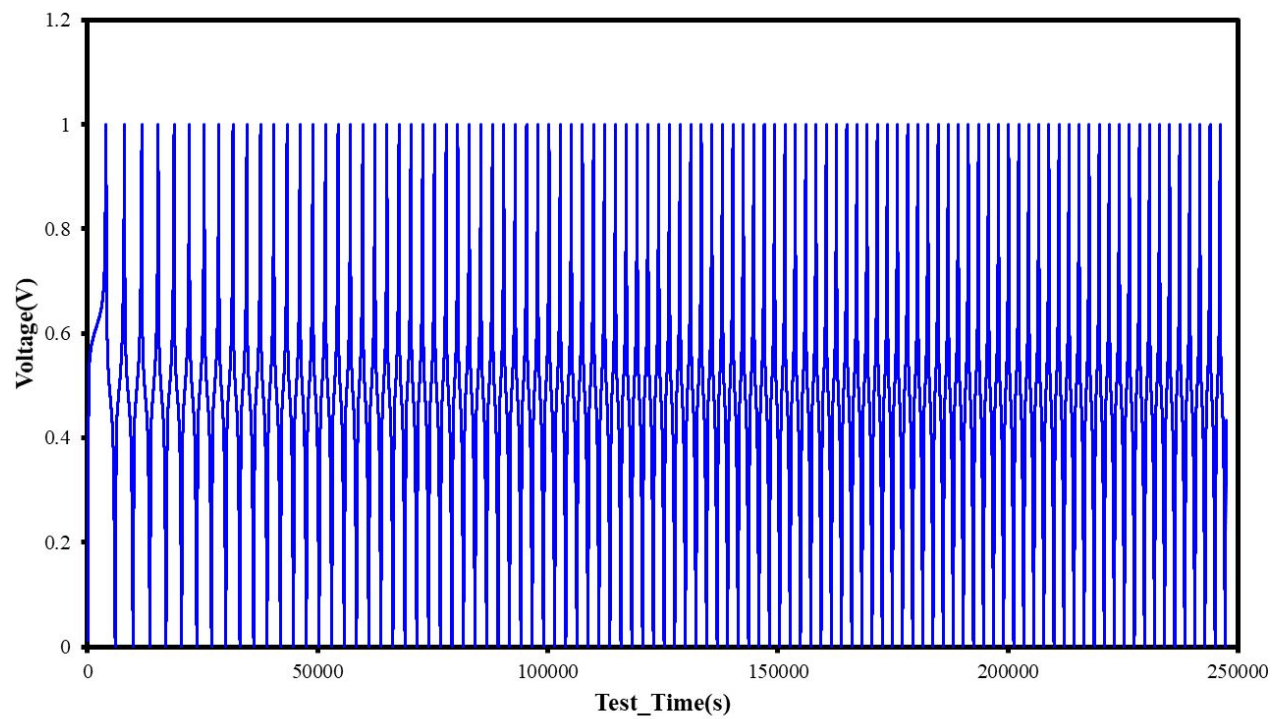

**Figure S14.** 100 charge and discharge cycles at constant current 25 mA for 1,1'-FcDS/2,7-AQDS RFB using 0.5 M H<sub>2</sub>SO<sub>4</sub> as supporting electrolyte. Hydronium cations serve as charge carriers during the cell operation.



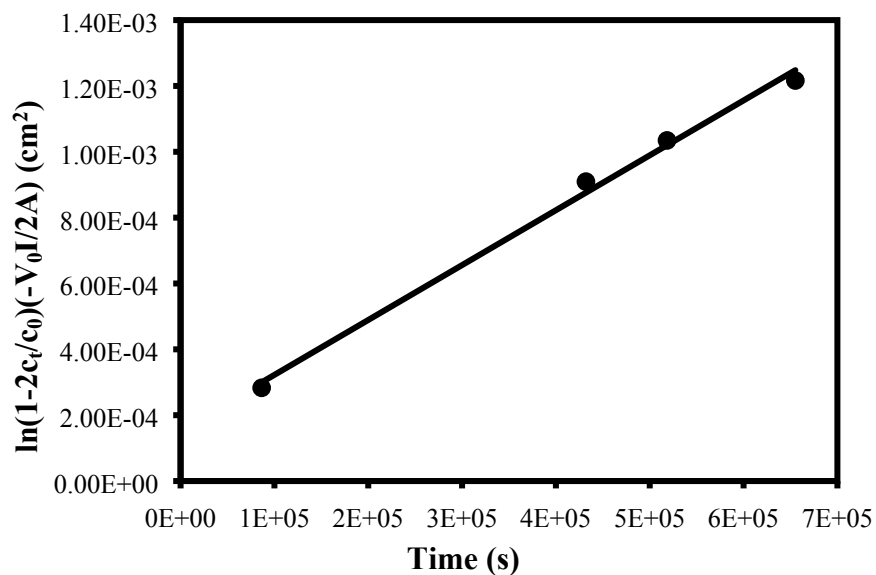

**Figure S15.** 1,1'-FcDS permeability calculation plot using  $P = \frac{\Delta \ln \left( 1 - \frac{2c_t}{c_0} \right) \left( \frac{V_0 I}{2A} \right)}{\Delta t}$ , where  $P$  is permeability,  $c_t$  is the concentration of 1,1'-FcDS in the receiving side,  $c_0$  is the concentration of 1,1'-FcDS in the donating side (0.03 M),  $V_0$  is the volume of solution in reservoir (30 mL),  $I$  is the thickness of membrane (183  $\mu\text{m}$ ),  $A$  is the membrane effective area (9  $\text{cm}^2$ ),  $t$  is time interval. The permeability is 1.67 E-9  $\text{cm}^2/\text{s}$  according to the slope of the trendline for plotted data.

**Table S1.** X-ray crystal data and structure parameters for compounds **2,7-AQDS** and **1,1'-FcDS**.

| <b>Compound</b>                                  | <b>2,7-AQDS</b>                                                                                 | <b>1,1'-FcDS</b>                                                                 |
|--------------------------------------------------|-------------------------------------------------------------------------------------------------|----------------------------------------------------------------------------------|
| CCDC                                             | 2009129                                                                                         | 2009128                                                                          |
| Empirical formula                                | C <sub>96</sub> H <sub>98</sub> N <sub>4</sub> Na <sub>12</sub> O <sub>69</sub> S <sub>12</sub> | C <sub>10</sub> H <sub>20</sub> FeNa <sub>2</sub> O <sub>12</sub> S <sub>2</sub> |
| Formula weight                                   | 3072.38                                                                                         | 498.21                                                                           |
| Crystal system                                   | Monoclinic                                                                                      | Triclinic                                                                        |
| Space group                                      | C2/m                                                                                            | P-1                                                                              |
| a/ Å                                             | 20.109(2)                                                                                       | 6.2579(4)                                                                        |
| b/ Å                                             | 20.778(2)                                                                                       | 6.7586(4)                                                                        |
| c/ Å                                             | 15.8044(14)                                                                                     | 23.6781(15)                                                                      |
| α(°)                                             | 90                                                                                              | 93.877(3)                                                                        |
| β(°)                                             | 112.816(5)                                                                                      | 96.594(3)                                                                        |
| γ(°)                                             | 90                                                                                              | 109.331(3)                                                                       |
| Volume (Å <sup>3</sup> )                         | 6087.0(11)                                                                                      | 932.77(10)                                                                       |
| Z                                                | 2                                                                                               | 2                                                                                |
| Dc (Mg/m <sup>3</sup> )                          | 1.676                                                                                           | 1.774                                                                            |
| μ (mm <sup>-1</sup> )                            | 0.370                                                                                           | 1.137                                                                            |
| F(000)                                           | 3156                                                                                            | 512                                                                              |
| reflns collected                                 | 102040                                                                                          | 38129                                                                            |
| indep. reflns                                    | 5544                                                                                            | 4630                                                                             |
| GOF on F <sup>2</sup>                            | 1.546                                                                                           | 1.071                                                                            |
| R1 (on F <sub>o</sub> <sup>2</sup> , I > 2σ(I))  | 0.1796                                                                                          | 0.0400                                                                           |
| wR2 (on F <sub>o</sub> <sup>2</sup> , I > 2σ(I)) | 0.4190                                                                                          | 0.1284                                                                           |
| R1 (all data)                                    | 0.2183                                                                                          | 0.0472                                                                           |
| wR2 (all data)                                   | 0.4383                                                                                          | 0.1315                                                                           |
